# Supplementary material for: Weight Pulling: A Novel Mouse Model of Human Progressive Resistance Exercise
Source: MDPI journal article supplement (doi:10.3390/cells10092459), 2021-09-17

### P-P38

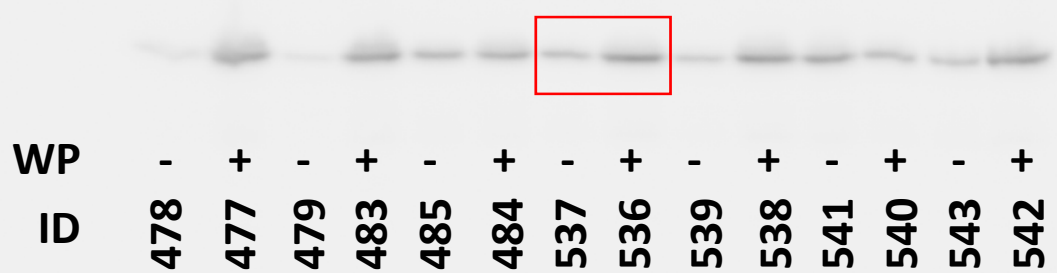

### T-P38

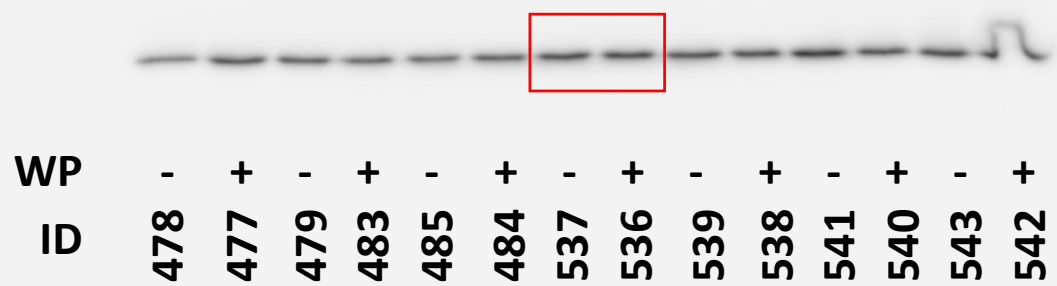

# P-MKK4

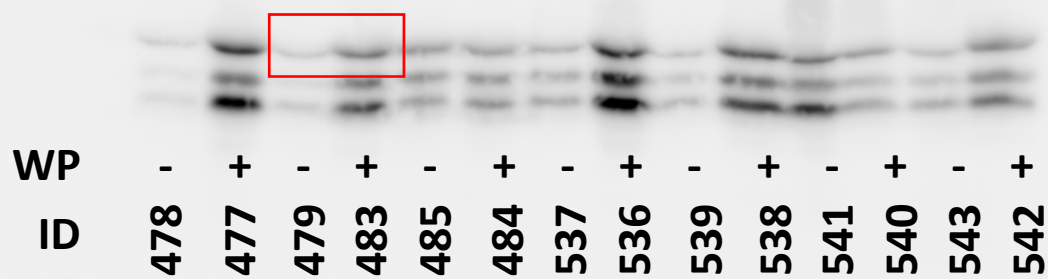

# T-MKK4

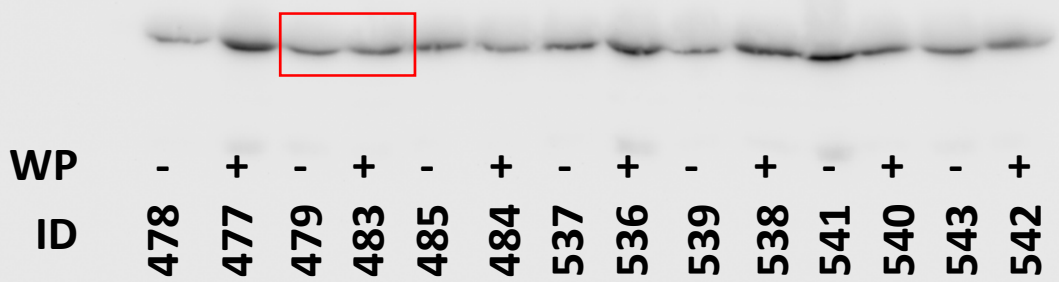

**P-70<sup>S6K</sup>(389)**

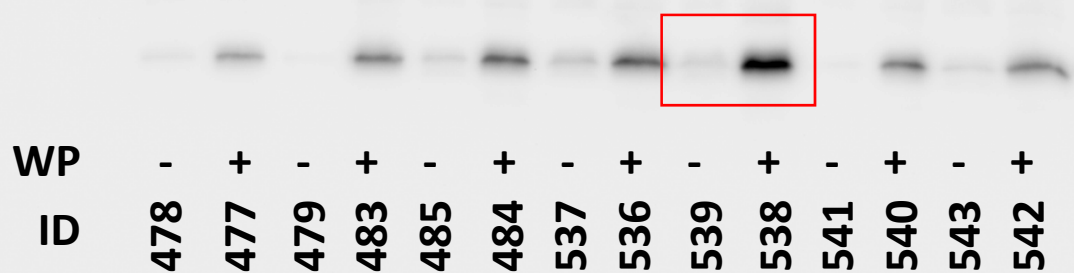

**T-p70S6K**

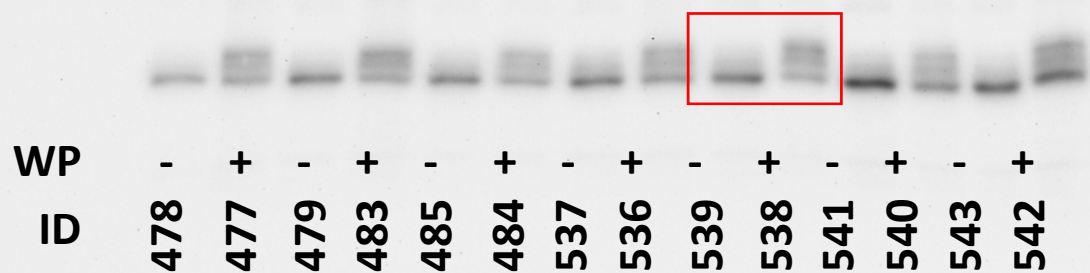

**P-S6 (240/4) (Gel B bottom half )**

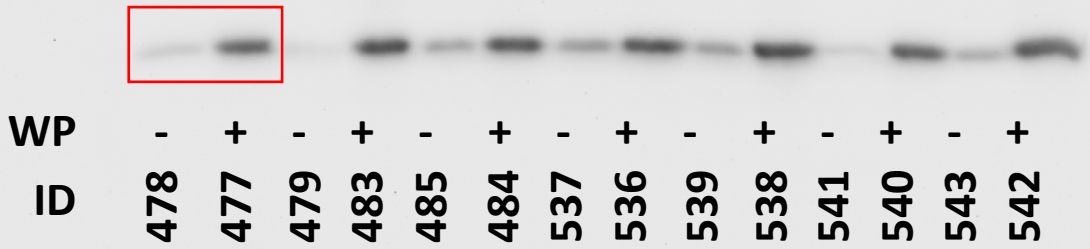

**T-S6 (Gel A bottom half – post strip reprobe for T-MKK4)**

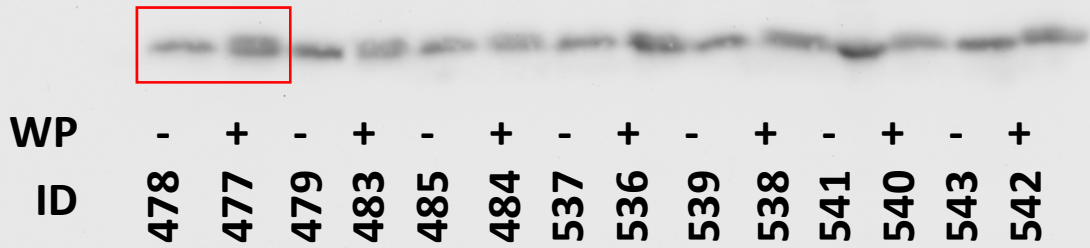

# T-4EBP1

| WP | 478 | 477 | 479 | 483 | 485 | 484 | 537 | 536 | 539 | 538 | 541 | 540 | 543 | 542 |
|----|-----|-----|-----|-----|-----|-----|-----|-----|-----|-----|-----|-----|-----|-----|
| ID | -   | +   | -   | +   | -   | +   | -   | +   | -   | +   | -   | +   | -   | +   |

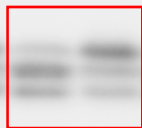

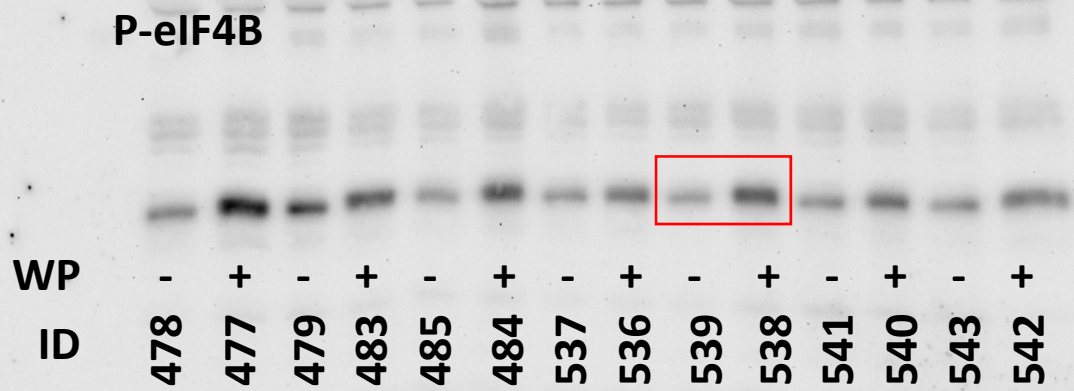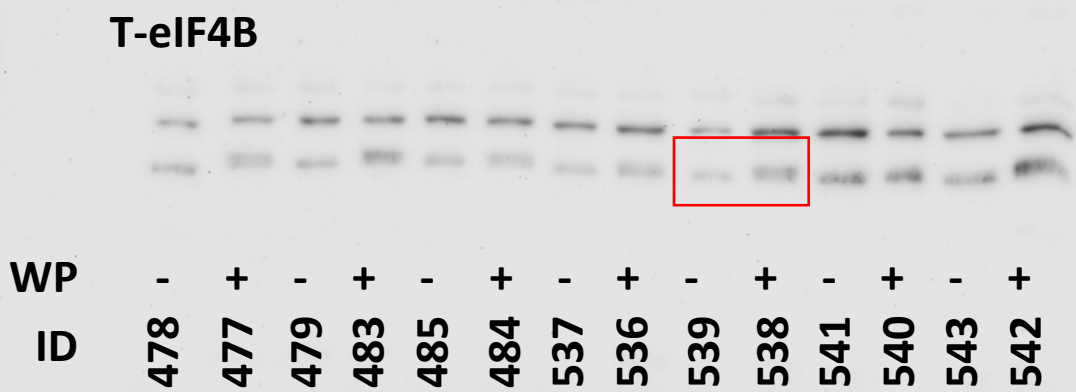

# P-eEF2

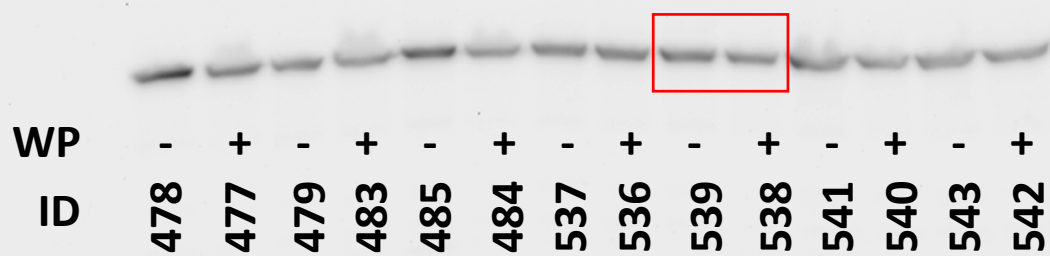

# T-eEF2

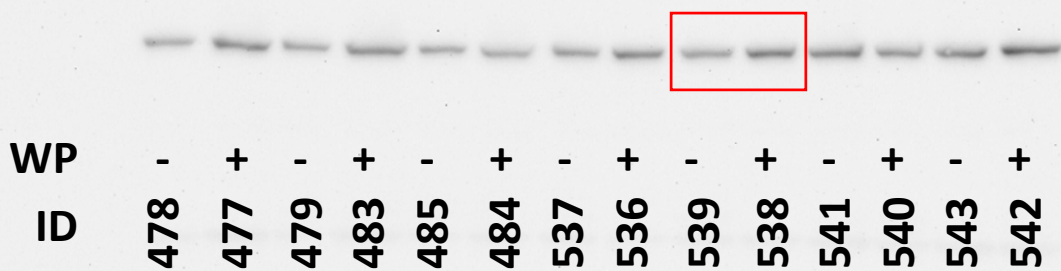



Puromycin

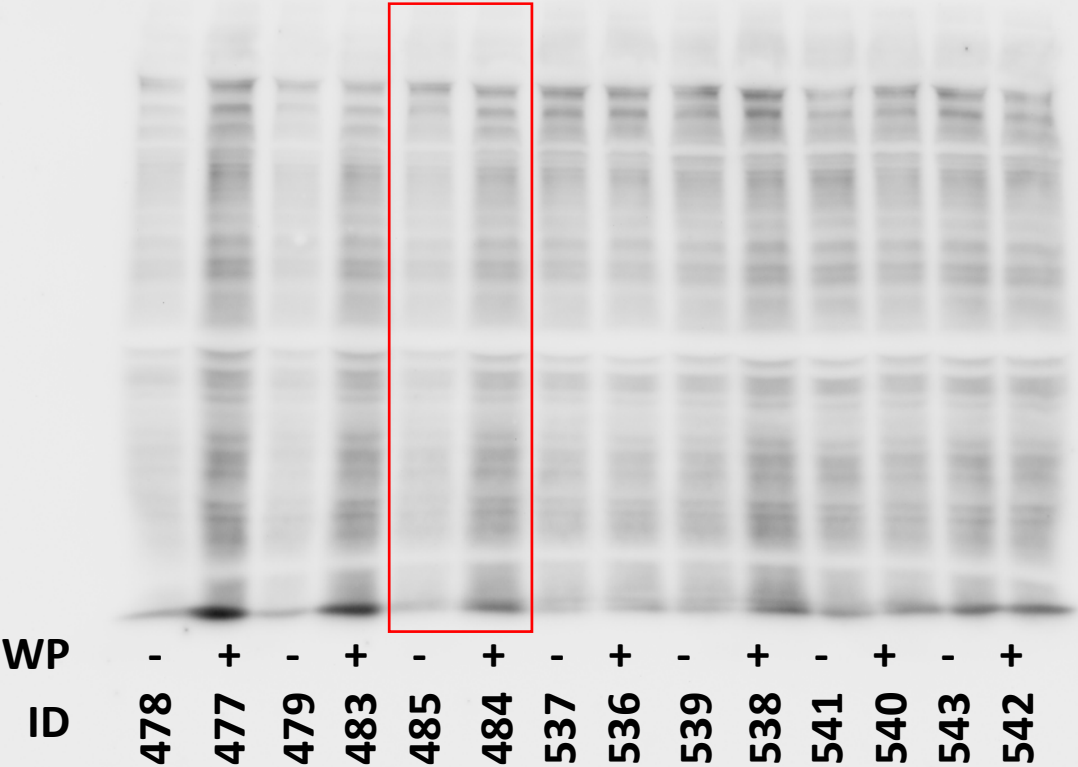

Total Protein (No-Stain)

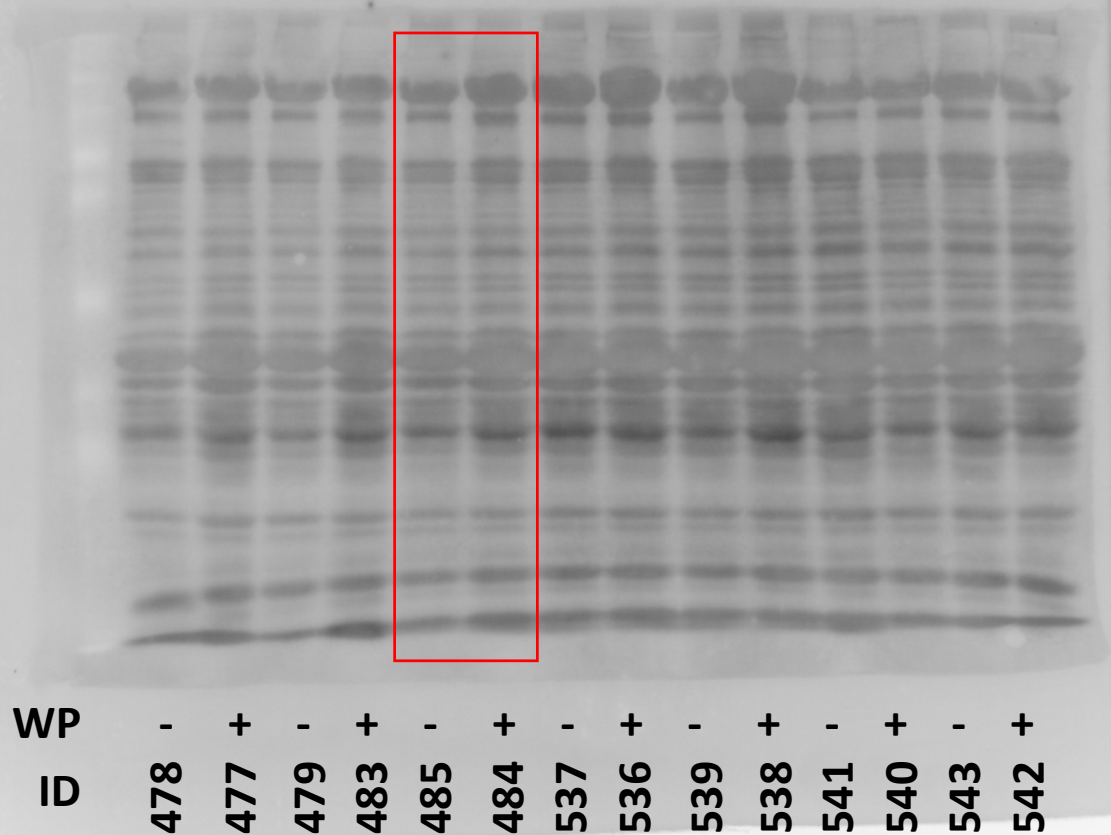

Supplement: s1 [file s1]
